# Supplementary material
Source: PubMed Central journal article supplement (PMC2659738)
Supplement: NIHMS91577-supplement-1_si_001.pdf [file NIHMS91577-supplement-1_si_001.pdf]

## Supplementary Material for

# Therapeutic index of gramicidin S is strongly modulated by D-phenylalanine analogues at the $\beta$ -turn

Concepción Solanas, Beatriz G. de la Torre, María Fernández-Reyes, Clara M. Santiveri, M.

Ángeles Jiménez, Luis Rivas, Ana I. Jiménez, David Andreu, and Carlos Cativiela

### Contents

#### Tables

Table ST1. Chemical shifts of GS and analogues **1–6** in aqueous solution

Table ST2.  $^3J_{C\alpha H-NH}$  coupling constants (Hz) measured for GS and analogues **1–6**.

Table ST3. Structural statistics for the 20 best structures calculated for GS and analogues **1–6**.

Table ST4. Restraints used in structure calculations of GS and analogues **1–6**.

#### Figures

Figure SF1. RP-HPLC retention times of GS and analogues **1–6**

Figure SF2. RP-HPLC chromatograms of purified GS and analogues **1–6**

Figure SF3. Model structures for GS and analogues **1–5**

**Table ST1.** Chemical shifts ( $\delta$ , ppm) of GS and analogues **1-6** in aqueous solution at pH 3.0 and 5°C.  $^1\text{H}$  and  $^{15}\text{N}$  chemical shifts were measured in  $\text{H}_2\text{O}/\text{D}_2\text{O}$  9:1 v/v and  $^{13}\text{C}$  chemical shifts in pure  $\text{D}_2\text{O}$ .  $^1\text{H}$ ,  $^{13}\text{C}$  and  $^{15}\text{N}$  chemical shifts with significant differences ( $\geq 0.2$  ppm for  $^1\text{H}$ ,  $\geq 1.0$  ppm for  $^{13}\text{C}$  and  $\geq 2.0$  ppm for  $^{15}\text{N}$ ) relative to GS are highlighted respectively in yellow, cyan and green background.

| Residue                  | Resonance                   | Peptide         |                 |                 |                 |                 |                 |               |
|--------------------------|-----------------------------|-----------------|-----------------|-----------------|-----------------|-----------------|-----------------|---------------|
|                          |                             | GS<br>D-Phe     | 1<br>D-Hpa      | 2<br>D-1-Nal    | 3<br>D-2-Nal    | 4<br>D-Dip      | 5<br>D-Flg      | 6<br>D-Tic    |
| Val 1/1'                 | HN                          | 7.68            | 7.63            | 7.61            | 7.82            | 7.79            | 8.25            | 7.52          |
|                          | $\text{H}^{15}\text{N}$     | 121.0           | 121.1           | ----            | 121.4           | ----            | 122.2           | 122.3         |
|                          | $\text{C}_\alpha\text{H}$   | 4.12            | 4.09            | 4.10            | 4.08            | 4.05            | 3.79            | 4.07          |
|                          | $^{13}\text{C}_\alpha$      | 62.05           | 62.14           | 62.01           | 62.29           | 62.28           | 63.33           | 62.21         |
|                          | $\text{C}_\beta\text{H}$    | 2.14            | 2.13            | 2.11            | 2.10            | 2.07            | 1.83            | 2.20          |
|                          | $^{13}\text{C}_\beta$       | 33.30           | 33.21           | 33.31           | 33.07           | 33.06           | 31.95           | 33.63         |
|                          | $\text{C}_\gamma\text{H}_3$ | 0.88,<br>0.93   | 0.88,<br>0.93   | 0.86,<br>0.89   | 0.88,<br>0.94   | 0.85,<br>0.96   | 0.72,<br>0.88   | 0.93,<br>1.01 |
| $^{13}\text{C}_\gamma$   | 21.12,<br>20.98             | 21.14,<br>21.05 | 21.13,<br>20.92 | 21.11,<br>21.02 | 21.07,<br>21.04 | 20.90,<br>21.25 | 20.88,<br>21.56 |               |
| Orn 2/2'                 | HN                          | 8.67            | 8.67            | 8.64            | 8.64            | 8.64            | 8.31            | 8.74          |
|                          | $\text{H}^{15}\text{N}$     | 125.8           | 126.0           | -----           | 125.9           | 126.1           | 125.5           | 127.2         |
|                          | $\text{C}_\alpha\text{H}$   | 4.78            | 4.77            | 4.79            | 4.73            | 4.71            | 4.36            | 4.77          |
|                          | $^{13}\text{C}_\alpha$      | 54.62           | 54.52           | 54.61           | 54.55           | 54.40           | 54.12           | 54.30         |
|                          | $\text{C}_\beta\text{H}$    | 1.71,<br>1.94   | 1.68,<br>1.91   | 1.73,<br>1.96   | 1.70,<br>1.92   | 1.69,<br>1.90   | 1.49,<br>1.68   | 1.49,<br>1.82 |
|                          | $^{13}\text{C}_\beta$       | 31.57           | 31.59           | 31.57           | 31.64           | 31.83           | 31.92           | 31.82         |
|                          | $\text{C}_\gamma\text{H}$   | 1.67,<br>1.67   | 1.62,<br>1.62   | 1.70,<br>1.70   | 1.67,<br>1.67   | 1.65,<br>1.65   | 1.42,<br>1.47   | 1.25,<br>1.25 |
|                          | $^{13}\text{C}_\gamma$      | 25.83           | 25.74           | 25.83           | 25.71           | 25.67           | 25.03           | 25.97         |
|                          | $\text{C}_\delta\text{H}$   | 3.01,<br>3.01   | 2.96,<br>2.96   | 3.02,<br>3.02   | 3.01,<br>3.01   | 3.00,<br>3.00   | 2.82,<br>2.82   | 2.44,<br>2.67 |
|                          | $^{13}\text{C}_\delta$      | 41.65           | 41.60           | 41.66           | 41.63           | 41.58           | 41.42           | 41.28         |
|                          | $\text{N}_\epsilon\text{H}$ | 7.70            | 7.63            | 7.73            | 7.71            | 7.72            | 7.49            | 7.02          |
| $^{15}\text{N}_\epsilon$ | 69.1                        | 69.1            | ----            | 69.2            | 69.1            | 69.2            | 68.6            |               |
| Leu 3/3'                 | HN                          | 8.71            | 8.73            | 8.72            | 8.59            | 8.71            | 8.03            | 9.02          |
|                          | $\text{H}^{15}\text{N}$     | 127.9           | 128.0           | ----            | 127.0           | 127.4           | 123.8           | 129.3         |
|                          | $\text{C}_\alpha\text{H}$   | 4.58            | 4.64            | 4.62            | 4.51            | 4.34            | 3.79            | 5.31          |

|           |                             |                 |                 |                 |                 |                 |                 |                 |
|-----------|-----------------------------|-----------------|-----------------|-----------------|-----------------|-----------------|-----------------|-----------------|
|           | $^{13}\text{C}_\alpha$      | 53.49           | 53.58           | 53.51           | 53.76           | 53.68           | 54.63           | 49.63           |
|           | $\text{C}_\beta\text{H}$    | 1.39,<br>1.42   | 1.46,<br>1.57   | 1.35,<br>1.42   | 1.26,<br>1.26   | 1.14,<br>1.31   | 0.32,<br>0.85   | 1.51,<br>1.64   |
|           | $^{13}\text{C}_\beta$       | 42.59           | 42.75           | 42.57           | 42.56           | 42.20           | 42.00           | 42.56           |
|           | $\text{C}_\gamma\text{H}$   | 1.39            | 1.47            | 1.42            | 1.31            | 1.30            | 0.81            | 1.46            |
|           | $^{13}\text{C}_\gamma$      | 26.90           | 27.03           | 26.93           | 26.77           | 26.78           | 26.38           | 26.60           |
|           | $\text{C}_\delta\text{H}_3$ | 0.85,<br>0.87   | 0.90,<br>0.94   | 0.86,<br>0.89   | 0.75,<br>0.76   | 0.74,<br>0.74   | 0.45,<br>0.51   | 0.91,<br>0.91   |
|           | $^{13}\text{C}_\delta$      | 24.25,<br>24.72 | 24.39,<br>24.65 | 24.31,<br>24.66 | 24.55,<br>24.04 | 24.60,<br>23.94 | 23.46,<br>24.40 | 25.68,<br>24.08 |
| dPhe*4/4' | HN                          | 9.07            | 9.01            | 9.21            | 9.10            | 8.87            | 7.83            | ----            |
|           | $\text{H}^{15}\text{N}$     | 130.7           | 129.8           | ----            | 129.6           | 130.0           | ----            | ----            |
|           | $\text{C}_\alpha\text{H}$   | 4.70            | 4.30            | 4.81            | 4.86            | 5.29            | 5.32            | 5.06            |
|           | $^{13}\text{C}_\alpha$      | 56.93           | 54.14           | 56.16           | 56.56           | 58.10           | 55.87           | 57.09           |
|           | $\text{C}_\beta\text{H}$    | 3.01,<br>3.09   | 2.06,<br>2.06   | 3.49,<br>3.67   | 3.23,<br>3.23   | 4.40            | 4.39            | 3.09,<br>3.28   |
|           | $^{13}\text{C}_\beta$       | 38.43           | 32.89           | 35.41           | 38.77           | 54.69           | 49.76           | 31.53           |
| Pro5/5'   | $\text{C}_\alpha\text{H}$   | 4.41            | 4.37            | 4.17            | 4.40            | 4.18            | 4.53            | 4.40            |
|           | $^{13}\text{C}_\alpha$      | 63.30           | 63.47           | 63.30           | 63.30           | 63.02           | 63.26           | 63.68           |
|           | $\text{C}_\beta\text{H}$    | 1.88,<br>1.91   | 2.01,<br>2.14   | 1.48,<br>1.76   | 1.73,<br>1.83   | 1.68,<br>1.78   | 1.86,<br>2.20   | 2.11,<br>2.26   |
|           | $^{13}\text{C}_\beta$       | 32.10           | 32.24           | 31.88           | 32.01           | 31.92           | 32.07           | 32.28           |
|           | $\text{C}_\gamma\text{H}$   | 1.65,<br>1.73   | 1.85,<br>1.98   | 1.24,<br>1.48   | 1.49,<br>1.69   | 1.46,<br>1.67   | 1.88,<br>1.92   | 2.00,<br>2.14   |
|           | $^{13}\text{C}_\gamma$      | 26.19           | 26.29           | 25.95           | 26.24           | 26.20           | 27.12           | 26.61           |
|           | $\text{C}_\delta\text{H}$   | 2.63,<br>3.69   | 3.30,<br>3.65   | 3.39,<br>3.39   | 2.75,<br>3.71   | 2.74,<br>3.72   | 3.65,<br>3.87   | 3.81,<br>4.02   |
|           | $^{13}\text{C}_\delta$      | 49.97           | 49.81           | 49.61           | 50.03           | 50.16           | 50.55           | 49.91           |

**Table ST2.**  $^3J_{C\alpha H-NH}$  coupling constants (Hz) measured for GS and its analogues in 1D  $^1H$  NMR spectra recorded in  $H_2O/D_2O$  9:1 v/v at pH 3.0 and 25°C.

| Peptide  | D-Phe* <sup>a</sup> | Val <sup>1,1'</sup> | Orn <sup>2,2'</sup> | Leu <sup>3,3'</sup> | D-Phe* <sup>4,4'</sup> |
|----------|---------------------|---------------------|---------------------|---------------------|------------------------|
| GS       | D-Phe               | 9.0                 | 9.2                 | 9.3                 | 3.5                    |
| <b>1</b> | D-Hpa               | broad               | 9.2                 | 9.3                 | 4.5                    |
| <b>2</b> | D-1-Nal             | nd <sup>b</sup>     | 8.7                 | 8.9                 | 4.3                    |
| <b>3</b> | D-2-Nal             | broad               | 9.0                 | 9.1                 | 4.2                    |
| <b>4</b> | D-Dip               | 8.3                 | 9.0                 | nd                  | 5.4                    |
| <b>5</b> | D-Flg               | broad               | 8.2                 | broad               | broad                  |
| <b>6</b> | D-Tic               | 9.2                 | 9.4                 | 9.9                 | —                      |

<sup>a</sup> D-Phe\* stands for D-Phe or the corresponding substitute. <sup>b</sup> Not determined because of signal overlapping.

**Table ST3.** Structural statistics for the 20 best structures calculated for GS and analogues **1–6**.

|                                  | <b>GS</b>      | <b>1</b>       | <b>2</b>        | <b>3</b>        | <b>4</b>       | <b>5</b>       | <b>6</b>       |
|----------------------------------|----------------|----------------|-----------------|-----------------|----------------|----------------|----------------|
|                                  | <b>(D-Phe)</b> | <b>(D-Hpa)</b> | <b>(D-1Nal)</b> | <b>(D-2Nal)</b> | <b>(D-Dip)</b> | <b>(D-Flg)</b> | <b>(D-Tic)</b> |
| Distance restraints <sup>a</sup> |                |                |                 |                 |                |                |                |
| Theoretical                      | 9              | 9              | 9               | 9               | 9              | 9              | 9              |
| Experimental                     | 108            | 185            | 78              | 86              | 131            | 145            | 112            |
| Dihedral angle constraints       |                |                |                 |                 |                |                |                |
| ( $\phi + \psi$ ) <sup>a</sup>   | 8              | 8              | 8               | 8               | 8              | 8              | 8              |
| H-bond restraints <sup>a</sup>   |                |                |                 |                 |                |                |                |
| NH V1 – O L3'/NH V1' – O L3      | 2              | 2              | 2               | 2               | 2              | 2              | 2              |
| NH L3' – O V1/NH L3 – O V1'      | 2              | 2              | 2               | 2               | 2              | 2              | ----           |
| RMSD (Å)                         |                |                |                 |                 |                |                |                |
| Backbone atoms                   | 0.2±0.1        | 0.2±0.3        | 0.4±0.2         | 0.4±0.2         | 0.1±0.1        | 0.1±0.1        | 0.1±0.1        |
| All heavy atoms                  | 1.2±0.2        | 1.8±0.3        | 1.7±0.4         | 1.4±0.4         | 0.8±0.2        | 0.8±0.3        | 0.5±0.2        |

<sup>a</sup> See Table ST4.

**Table ST4.** Characteristic antiparallel  $\beta$ -sheet backbone restraints used in structure calculations of GS and analogues 1-6. For calculations, residues were renumbered from 1 to 10 starting with Leu 3.

**A.** List of angle restraints used for structure calculation in GS and analogues 1-6. Angle restraints for Val1/1' were not included because conformational shifts deviates from those expected for typical  $\beta$ -sheet residues.

|    |     |     |        |        |
|----|-----|-----|--------|--------|
| 1  | LEU | PHI | -149.0 | -129.0 |
| 1  | LEU | PSI | 145.0  | 125.0  |
| 5  | ORN | PHI | -149.0 | -129.0 |
| 5  | ORN | PSI | 145.0  | 125.0  |
| 6  | LEU | PHI | -149.0 | -129.0 |
| 6  | LEU | PSI | 145.0  | 125.0  |
| 10 | ORN | PHI | -149.0 | -129.0 |
| 10 | ORN | PSI | 145.0  | 125.0  |

**B.** List of lower limit distance restraints used for structure calculation in GS and analogues 1-6.

|    |     |    |   |     |    |                   |
|----|-----|----|---|-----|----|-------------------|
| 10 | ORN | C  | 1 | LEU | N  | 1.36 <sup>a</sup> |
| 10 | ORN | C  | 1 | LEU | CA | 2.45 <sup>a</sup> |
| 10 | ORN | O  | 1 | LEU | N  | 2.29 <sup>a</sup> |
| 10 | ORN | CA | 1 | LEU | N  | 2.44 <sup>a</sup> |
| 1  | LEU | O  | 4 | VAL | N  | 2.70 <sup>b</sup> |
| 1  | LEU | O  | 4 | VAL | HN | 1.80 <sup>b</sup> |
| 4  | VAL | O  | 1 | LEU | N  | 2.70 <sup>b</sup> |
| 4  | VAL | O  | 1 | LEU | HN | 1.80 <sup>b</sup> |
| 6  | LEU | O  | 9 | VAL | N  | 2.70 <sup>b</sup> |
| 6  | LEU | O  | 9 | VAL | HN | 1.80 <sup>b</sup> |
| 9  | VAL | O  | 6 | LEU | N  | 2.70 <sup>b</sup> |
| 9  | VAL | O  | 6 | LEU | HN | 1.80 <sup>b</sup> |

**C.** List of upper limit distance restraints used for structure calculation in GS and analogues 1-6.

|    |     |    |    |     |    |                     |
|----|-----|----|----|-----|----|---------------------|
| 1  | LEU | N  | 10 | ORN | C  | 1.36 <sup>a</sup>   |
| 1  | LEU | CA | 10 | ORN | C  | 2.45 <sup>a</sup>   |
| 1  | LEU | N  | 10 | ORN | O  | 2.29 <sup>a</sup>   |
| 1  | LEU | N  | 10 | ORN | CA | 2.44 <sup>a</sup>   |
| 1  | LEU | O  | 4  | VAL | N  | 3.00 <sup>b</sup>   |
| 1  | LEU | O  | 4  | VAL | HN | 2.00 <sup>b</sup>   |
| 1  | LEU | N  | 4  | VAL | O  | 3.00 <sup>b</sup>   |
| 1  | LEU | HN | 4  | VAL | O  | 2.00 <sup>b</sup>   |
| 6  | LEU | O  | 9  | VAL | N  | 3.00 <sup>b</sup>   |
| 6  | LEU | O  | 9  | VAL | HN | 2.00 <sup>b</sup>   |
| 6  | LEU | N  | 9  | VAL | O  | 3.00 <sup>b</sup>   |
| 6  | LEU | HN | 9  | VAL | O  | 2.00 <sup>b</sup>   |
| 9  | VAL | HA | 10 | ORN | HN | 2.30 <sup>c,d</sup> |
| 10 | ORN | HA | 1  | LEU | HN | 2.30 <sup>c,d</sup> |
| 4  | VAL | HA | 5  | ORN | HN | 2.30 <sup>c,d</sup> |
| 5  | ORN | HA | 6  | LEU | HN | 2.30 <sup>c,d</sup> |
| 4  | VAL | HN | 1  | LEU | HN | 3.40 <sup>c,e</sup> |
| 9  | VAL | HN | 6  | LEU | HN | 3.40 <sup>c,e</sup> |
| 10 | ORN | HA | 5  | ORN | HA | 2.30 <sup>c,e</sup> |
| 10 | ORN | HA | 6  | LEU | HN | 3.30 <sup>c,e</sup> |
| 5  | ORN | HA | 1  | LEU | HN | 3.30 <sup>c,e</sup> |

<sup>a</sup> Required by CYANA for peptide backbone cyclization. <sup>b</sup> Restraints corresponding to the four hydrogen-bonds between Val1/1' and Leu3/3'. <sup>c</sup> Ideal upper limit restraints for backbone protons in canonical antiparallel  $\beta$ -sheet structures (averaged distances plus 0.1Å). <sup>d</sup> Sequential C $\alpha$ H-NH distance restraints in  $\beta$ -strands. <sup>e</sup> Cross-strand distance restraints in the antiparallel  $\beta$ -sheet.

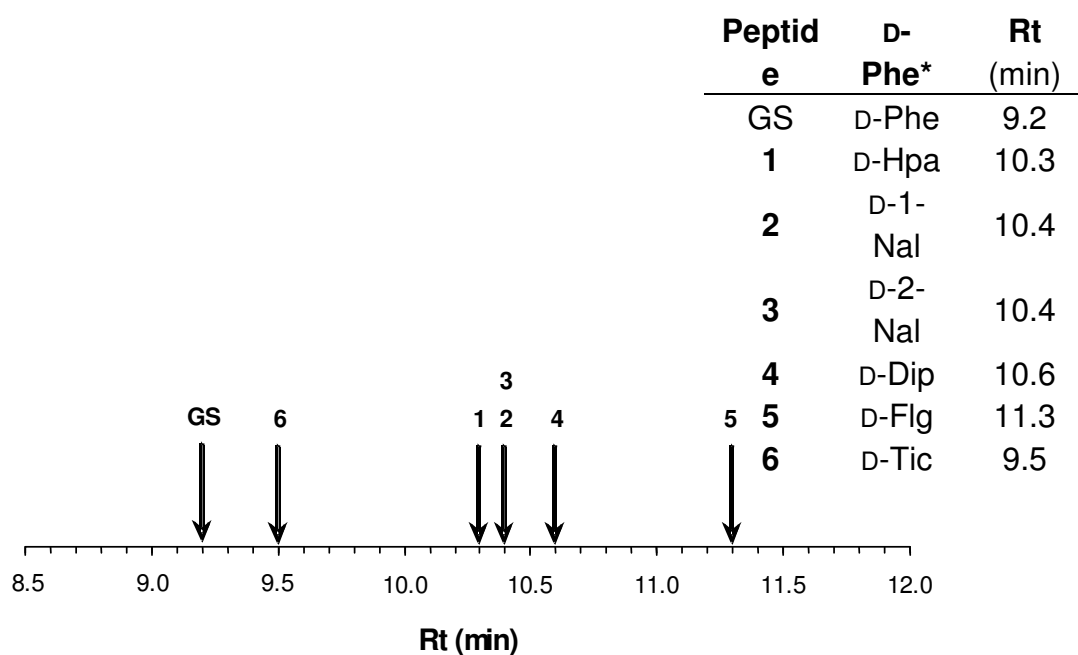

**Figure SF1.** Schematic representation of the retention times (Rt) observed for gramicidin S (GS) and analogues **1–6** on analytical RP-HPLC. Conditions: C<sub>8</sub> Phenomenex<sup>®</sup> column (Luna 3 μm, 100 Å, 50 × 4.6 mm); linear gradient of 5–95% CH<sub>3</sub>CN (0.036% TFA, v/v) in H<sub>2</sub>O (0.045% TFA, v/v) over 15 min; flow rate 1 mL/min. D-Phe\* stands for D-Phe or the corresponding replacement.

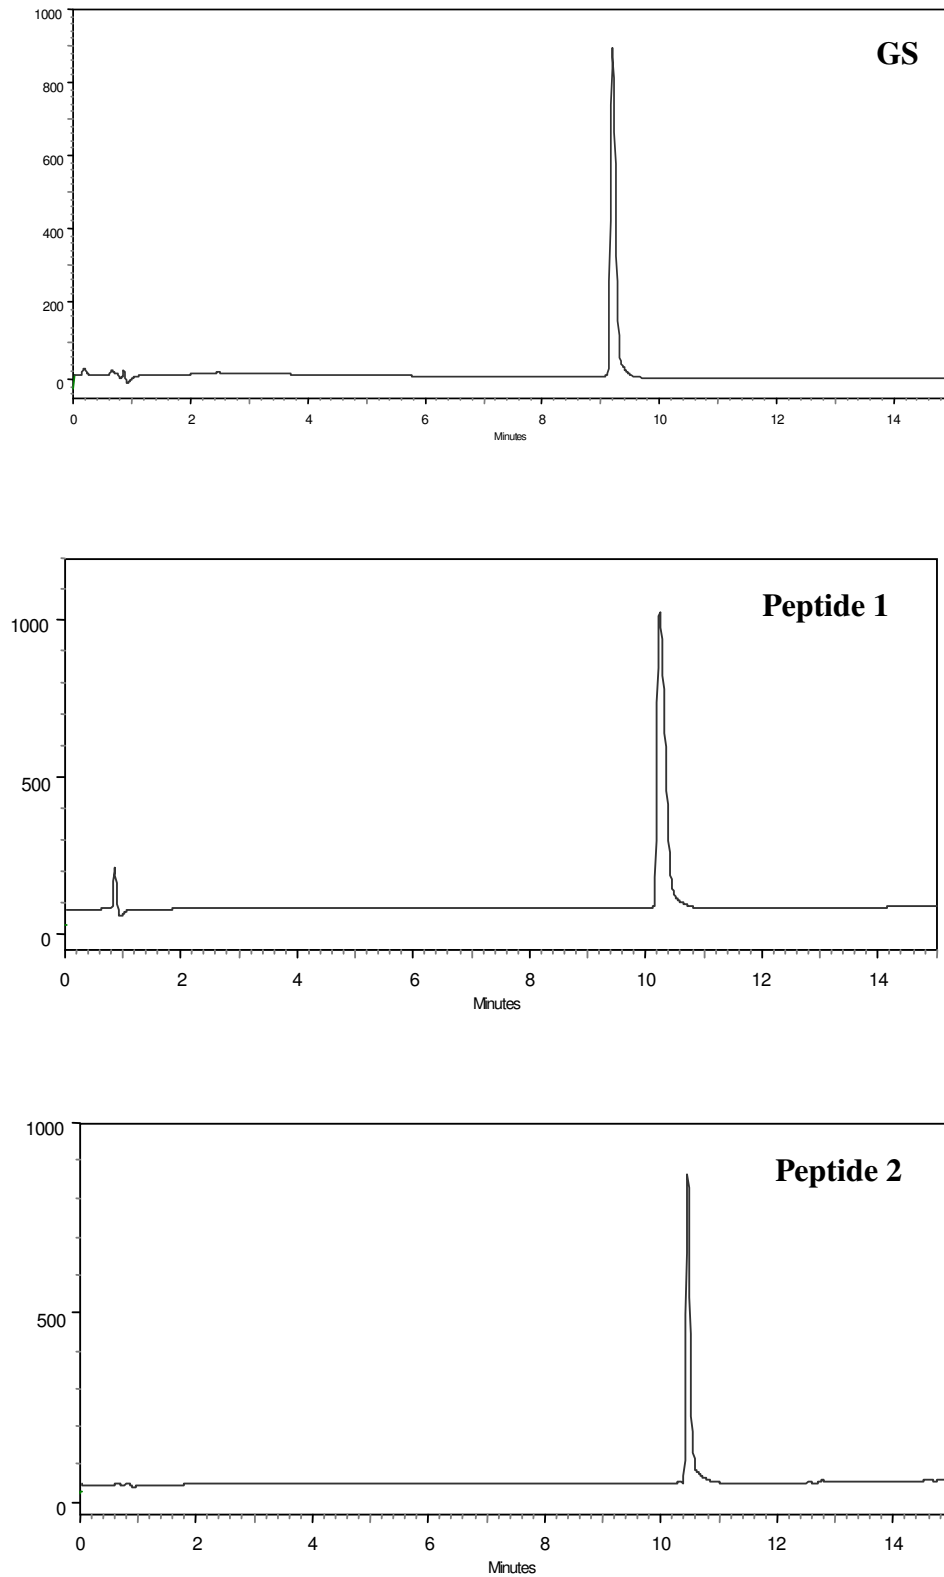

**Figure SF2.** HPLC profile of purified peptides (GS and analogues **1-6**). See Figure SF1 for elution conditions.



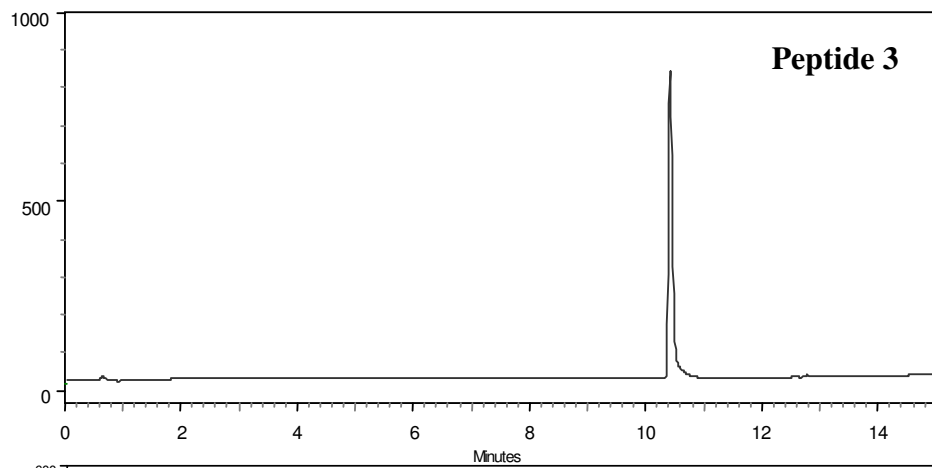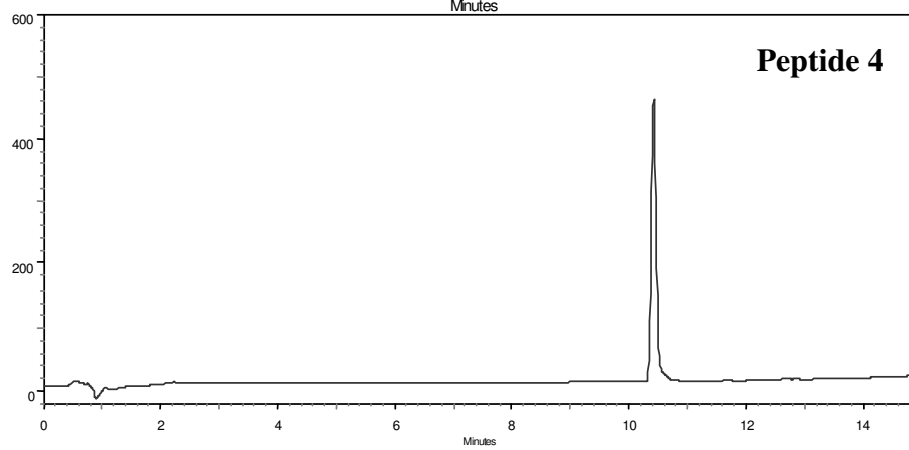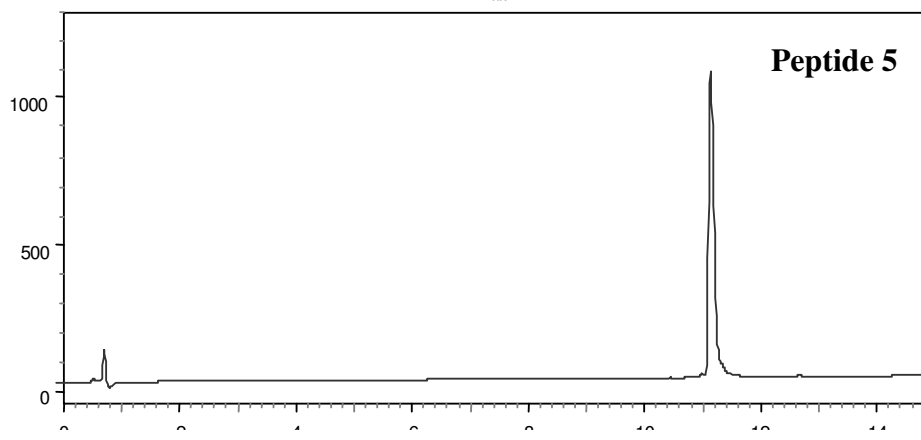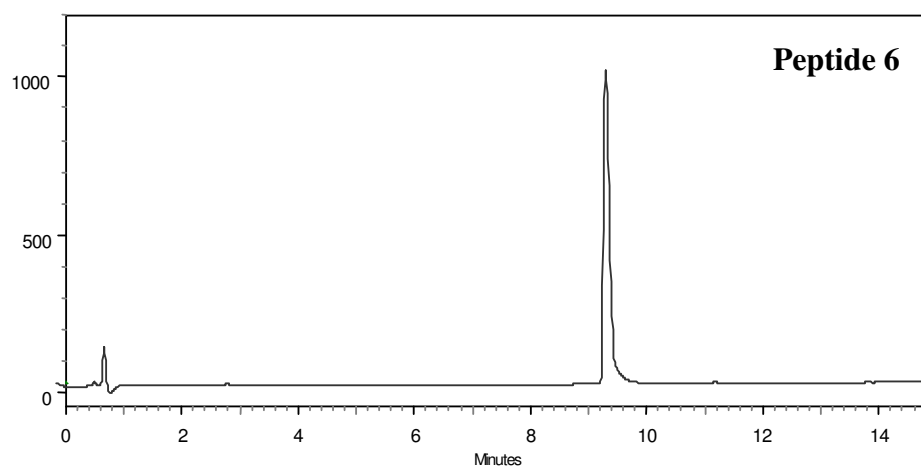

**Figure SF2.** (Cont.).

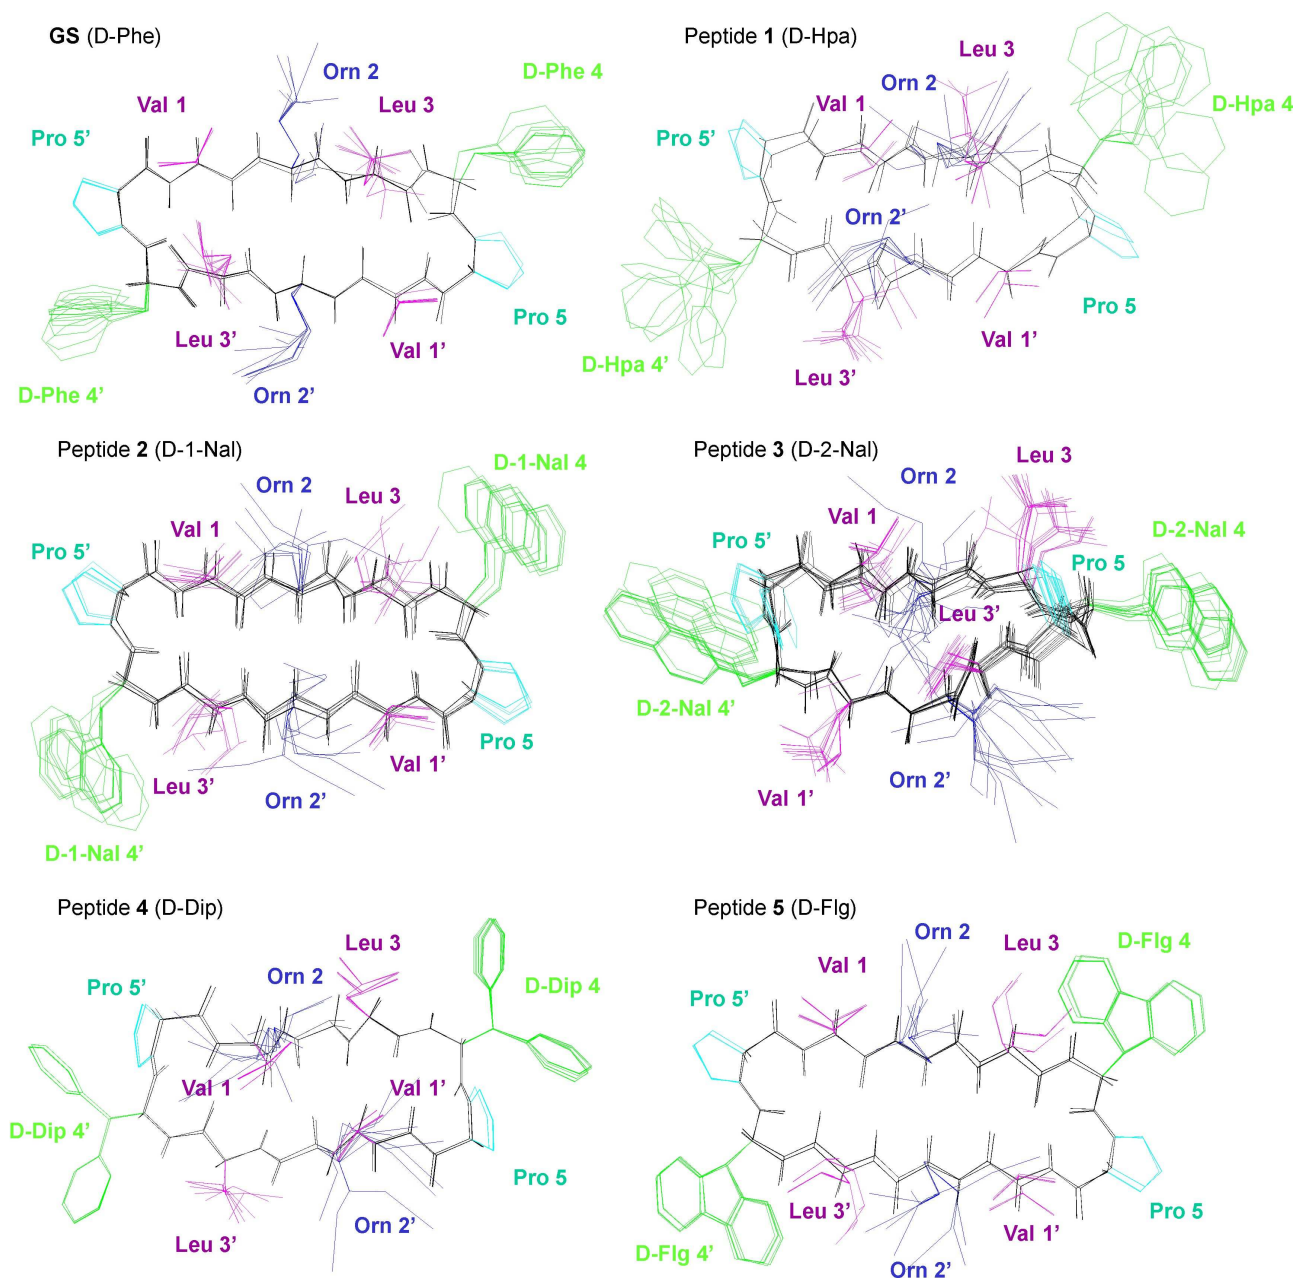

**Figure SF3.** Model structures for GS and analogues 1–5. Backbone atoms are shown in black. Side chains for aromatic residues are colored in green, for Pro in cyan, for Orn in blue, and for Leu and Val in magenta.
